# Supplementary material
Source: PubMed Central journal article supplement (PMC2819551)
Supplement: NIHMS170380-supplement-1_si_001.pdf [file NIHMS170380-supplement-1_si_001.pdf]

# Supporting Information

## Effects of Interdomain-Tether Length and Flexibility on the Kinetics of Intramolecular Electron Transfer in Human Sulfite Oxidase<sup>†</sup>

*Kayunta Johnson-Winters, Anna Nordstrom, Safia Emesh, Andrei V. Astashkin, Asha Rajapakshe, Robert Berry, Gordon Tollin\* and John H. Enemark\**

Department of Chemistry and Biochemistry, The University of Arizona, Tucson, Arizona 85721

\* To whom correspondence should be addressed. J.H.E.: e-mail, [jenemark@u.arizona.edu](mailto:jenemark@u.arizona.edu); phone, (520) 621-2245; fax, (520) 626-8065. G.T.: e-mail, [gtollin@u.arizona.edu](mailto:gtollin@u.arizona.edu); phone, (520) 621-3447; fax, (520) 621-9288.

### Table of Contents:

| Page | Table | Title                                                                 |
|------|-------|-----------------------------------------------------------------------|
| 2    | S1    | Primer Design for Site-Directed Mutagenesis of Human Sulfite Oxidase  |
| 3    | S2    | Iron to Molybdenum Ratios determined using Inductively Coupled Plasma |
| 4    | S3    | Laser Flash Photolysis Results for Proline to Alanine Mutants         |
| 5    | S4    | Laser Flash Photolysis Results for Tether Deletion Mutants of HSO     |

**Table S1.** Primer Design for Site-Directed Mutagenesis of Human Sulfite Oxidase.

| Mutant                            | Template       | Primer  | Primer sequence                      |
|-----------------------------------|----------------|---------|--------------------------------------|
| P105A                             | <i>wt</i> HSO  | forward | GAGCTGAATGCTGAAGACAAGGTA             |
|                                   |                | reverse | TACCTTGTCTTCAGCATTTCAGCTC            |
| P111A                             | <i>wt</i> HSO  | forward | AAGGTAGCCGCCACCGTGGA                 |
|                                   |                | reverse | TCCACGGTGGCGGCTACCTT                 |
| P118A                             | <i>wt</i> HSO  | forward | AGACCTCTGACGCTTATGCTGAT              |
|                                   |                | reverse | ATCAGCATAAGCGTCAGAGGTCT              |
| P105A/P111A                       | P105A          | forward | AAGGTAGCCGCCACCGTGGA                 |
|                                   |                | reverse | TCCACGGTGGCGGCTACCTT                 |
| P105A/P111A/P118A                 | P105A/P111A    | forward | AGACCTCTGACGCTTATGCTGAT              |
|                                   |                | reverse | ATCAGCATAAGCGTCAGAGGTCT              |
| $\Delta$ K108V109A110             | <i>wt</i> HSO  | forward | CCTGAAGACCCACCGTGGAGACCTCTGACCCTTAT  |
|                                   |                | reverse | ATAAGGGTCAGAGGTCTCCACGGTGGGGTCTTCAGG |
| $\Delta$ K108V109A110T112         | $\Delta$ KVA   | forward | CCTGAAGACCCCGTGGAGACC                |
|                                   |                | reverse | GGTCTCCACGGGGTCTTCAGG                |
| $\Delta$ K108V109A110T112V113     | $\Delta$ KVAT  | forward | GAAGACCCCGAGACCTCT                   |
|                                   |                | reverse | AGAGGTCTCGGGGTCTTC                   |
| $\Delta$ K108V109A110T112V113T115 | $\Delta$ KVATV | forward | ATCCTGAAGACCCCGAGTCTGACCCTTA         |
|                                   |                | reverse | TAAGGGTCAGACTCGGGGTCTTCAGGAT         |

**Table S2 Iron to Molybdenum Ratios Determined using Inductively Coupled Plasma**

| <b>HSO Mutant</b>               | <b>Iron to Molybdenum Ratio</b>   |
|---------------------------------|-----------------------------------|
| <b>P111A</b>                    | <b><math>0.70 \pm 0.03</math></b> |
| <b>P105A/P111A</b>              | <b><math>1.0 \pm 0.03</math></b>  |
| <b><math>\Delta</math>KVA</b>   | <b><math>1.0 \pm 0.03</math></b>  |
| <b><math>\Delta</math>KVAT</b>  | <b><math>0.64 \pm 0.02</math></b> |
| <b><math>\Delta</math>KVATV</b> | <b><math>0.70 \pm 0.02</math></b> |

**Table S3.** Laser Flash Photolysis Results for Proline to Alanine Mutants

|               |                                     | pH 6.8          | pH 7.0          | pH 7.4          | pH 7.61         |
|---------------|-------------------------------------|-----------------|-----------------|-----------------|-----------------|
| <i>wt</i> HSO | $k_{\text{et}}$ ( $\text{s}^{-1}$ ) | 427 $\pm$ 36    | 465 $\pm$ 24    | 467 $\pm$ 19    | 338 $\pm$ 16    |
|               | $k_{\text{f}}$ ( $\text{s}^{-1}$ )  | 88 $\pm$ 7      | 121 $\pm$ 6     | 147 $\pm$ 6     | 105 $\pm$ 5     |
|               | $k_{\text{r}}$ ( $\text{s}^{-1}$ )  | 339 $\pm$ 29    | 344 $\pm$ 18    | 320 $\pm$ 13    | 233 $\pm$ 11    |
|               | $K_{\text{eq}}$                     | 0.26 $\pm$ 0.01 | 0.35 $\pm$ 0.01 | 0.46 $\pm$ 0.02 | 0.45 $\pm$ 0.02 |
| P105A         | $k_{\text{et}}$ ( $\text{s}^{-1}$ ) | 136 $\pm$ 18    | 236 $\pm$ 11    | 146 $\pm$ 23    | 118 $\pm$ 6     |
|               | $k_{\text{f}}$ ( $\text{s}^{-1}$ )  | 25 $\pm$ 3      | 65 $\pm$ 3      | 23 $\pm$ 4      | 36 $\pm$ 2      |
|               | $k_{\text{r}}$ ( $\text{s}^{-1}$ )  | 111 $\pm$ 19    | 171 $\pm$ 12    | 123 $\pm$ 23    | 81 $\pm$ 6      |
|               | $K_{\text{eq}}$                     | 0.22 $\pm$ 0.01 | 0.38 $\pm$ 0.02 | 0.19 $\pm$ 0.02 | 0.44 $\pm$ 0.03 |
| P111A         | $k_{\text{et}}$ ( $\text{s}^{-1}$ ) | 435 $\pm$ 26    | 403 $\pm$ 28    | 359 $\pm$ 19    | 283 $\pm$ 12    |
|               | $k_{\text{f}}$ ( $\text{s}^{-1}$ )  | 95 $\pm$ 6      | 107 $\pm$ 7     | 108 $\pm$ 6     | 86 $\pm$ 4      |
|               | $k_{\text{r}}$ ( $\text{s}^{-1}$ )  | 340 $\pm$ 20    | 296 $\pm$ 21    | 251 $\pm$ 13    | 197 $\pm$ 8     |
|               | $K_{\text{eq}}$                     | 0.28 $\pm$ 0.02 | 0.36 $\pm$ 0.01 | 0.43 $\pm$ 0.01 | 0.44 $\pm$ 0.02 |
| P105A/P111A   | $k_{\text{et}}$ ( $\text{s}^{-1}$ ) | *ND             | 136 $\pm$ 18    | 93 $\pm$ 11     | 95 $\pm$ 6      |
|               | $k_{\text{f}}$ ( $\text{s}^{-1}$ )  | *ND             | 22 $\pm$ 3      | 23 $\pm$ 3      | 24 $\pm$ 2      |
|               | $k_{\text{r}}$ ( $\text{s}^{-1}$ )  | *ND             | 114 $\pm$ 18    | 70 $\pm$ 11     | 70 $\pm$ 7      |
|               | $K_{\text{eq}}$                     | *ND             | 0.19 $\pm$ 0.01 | 0.33 $\pm$ 0.02 | 0.34 $\pm$ 0.01 |

\*no heme reoxidation was observed.

**Table S4.** Laser Flash Photolysis Results for Tether Deletion Mutants of HSO

|                |                                     | pH 6.8          | pH 7.0          | pH 7.4          | pH 7.61         |
|----------------|-------------------------------------|-----------------|-----------------|-----------------|-----------------|
| <i>wt</i> HSO  | $k_{\text{et}}$ ( $\text{s}^{-1}$ ) | 427 $\pm$ 36    | 465 $\pm$ 24    | 467 $\pm$ 19    | 338 $\pm$ 16    |
|                | $k_{\text{f}}$ ( $\text{s}^{-1}$ )  | 88 $\pm$ 7      | 121 $\pm$ 6     | 147 $\pm$ 6     | 105 $\pm$ 5     |
|                | $k_{\text{r}}$ ( $\text{s}^{-1}$ )  | 339 $\pm$ 29    | 344 $\pm$ 18    | 320 $\pm$ 13    | 233 $\pm$ 11    |
|                | $K_{\text{eq}}$                     | 0.26 $\pm$ 0.01 | 0.35 $\pm$ 0.01 | 0.46 $\pm$ 0.02 | 0.45 $\pm$ 0.02 |
| $\Delta$ KVA   | $k_{\text{et}}$ ( $\text{s}^{-1}$ ) | 406 $\pm$ 15    | 393 $\pm$ 15    | 294 $\pm$ 14    | 241 $\pm$ 10    |
|                | $k_{\text{f}}$ ( $\text{s}^{-1}$ )  | 107 $\pm$ 4     | 102 $\pm$ 4     | 98 $\pm$ 5      | 85 $\pm$ 4      |
|                | $k_{\text{r}}$ ( $\text{s}^{-1}$ )  | 299 $\pm$ 11    | 291 $\pm$ 11    | 196 $\pm$ 9     | 156 $\pm$ 6     |
|                | $K_{\text{eq}}$                     | 0.36 $\pm$ 0.01 | 0.35 $\pm$ 0.01 | 0.5 $\pm$ 0.02  | 0.54 $\pm$ 0.02 |
| $\Delta$ KVAT  | $k_{\text{et}}$ ( $\text{s}^{-1}$ ) | 188 $\pm$ 12    | 165 $\pm$ 3     | 165 $\pm$ 3     | 143 $\pm$ 3     |
|                | $k_{\text{f}}$ ( $\text{s}^{-1}$ )  | 55 $\pm$ 5      | 43 $\pm$ 4      | 59 $\pm$ 2      | 50 $\pm$ 3      |
|                | $k_{\text{r}}$ ( $\text{s}^{-1}$ )  | 133 $\pm$ 13    | 122 $\pm$ 5     | 106 $\pm$ 4     | 94 $\pm$ 4      |
|                | $K_{\text{eq}}$                     | 0.41 $\pm$ 0.02 | 0.35 $\pm$ 0.03 | 0.56 $\pm$ 0.01 | 0.53 $\pm$ 0.03 |
| $\Delta$ KVATV | $k_{\text{et}}$ ( $\text{s}^{-1}$ ) | 7.6 $\pm$ 0.2   | 7.0 $\pm$ 0.1   | 6.4 $\pm$ 0.1   | 5.9 $\pm$ 0.1   |
|                | $k_{\text{f}}$ ( $\text{s}^{-1}$ )  | 2.8 $\pm$ 0.1   | 2.6 $\pm$ 0.1   | 2.8 $\pm$ 0.1   | 2.4 $\pm$ 0.1   |
|                | $k_{\text{r}}$ ( $\text{s}^{-1}$ )  | 4.8 $\pm$ 0.1   | 4.4 $\pm$ 0.1   | 3.6 $\pm$ 0.1   | 3.4 $\pm$ 0.1   |
|                | $K_{\text{eq}}$                     | 0.59 $\pm$ 0.01 | 0.63 $\pm$ 0.02 | 0.91 $\pm$ 0.03 | 0.87 $\pm$ 0.03 |
